# Supplementary material for: Transcriptome Analysis of Kiwifruit in Response to Pseudomonas syringae pv. actinidiae Infection
Source: MDPI journal article supplement (doi:10.3390/ijms19020373), 2018-01-26
Supplement: s1 [file s1]

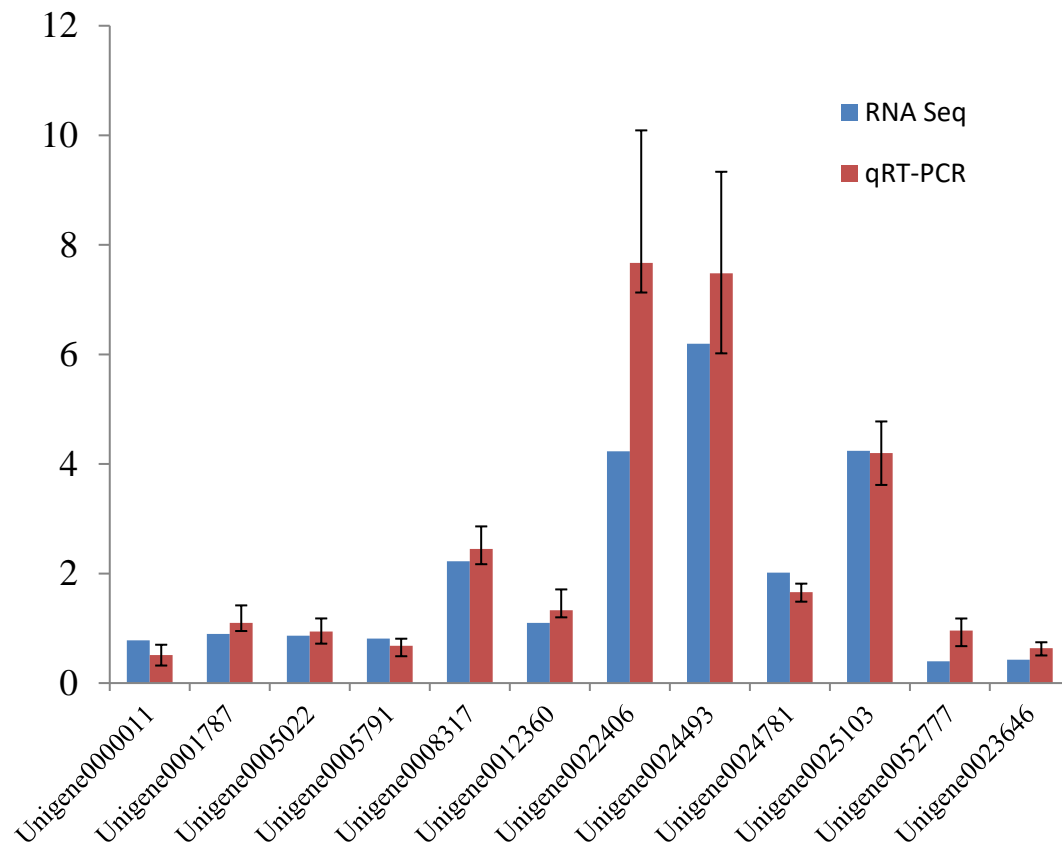

Figure S1. Expression levels of the selected unigenes from RNA sequencing data and qRT-PCR. Expression values were displayed by the fold of XJ3 to PY3.
